# Supplementary material for: Chemokine receptor co-expression reveals aberrantly distributed TH effector memory cells in GPA patients
Source: PubMed Central journal article supplement (PMC5471953; doi:10.1186/s13075-017-1343-8), 2017-06-14
Supplement: 13075_2017_1343_MOESM1_ESM.pdf [file 13075_2017_1343_MOESM1_ESM.pdf]

1 **Additional file 1**

2

3 **Table S1: Linear regression analysis for percentages of CD4<sup>+</sup>T<sub>EM</sub> cells, T<sub>EM</sub>1,**

4 **and T<sub>EM</sub>17 cells between r-GPA patients and HCs**

|                                            | <b>Predicting variable</b>                     | <b>B</b> | <b>(95% CI)</b>   | <b>p-value</b> |
|--------------------------------------------|------------------------------------------------|----------|-------------------|----------------|
| <b>CD4<sup>+</sup>T<sub>EM</sub> cells</b> | Group (r-GPA and HCs)                          | 17.3     | (12,104 – 22,516) | <0.0001        |
|                                            | CMV and age                                    | 17.1     | (12,161 – 21,969) | <0.0001        |
| <b>Log(T<sub>EM</sub>1) cells</b>          | Group (r-GPA and HCs)                          | -.121    | (-.219 – -.023)   | 0.016          |
|                                            | CMV and age                                    | -.107    | (-.198 – -.017)   | 0.021          |
| <b>T<sub>EM</sub>17 cells</b>              | Group (r-GPA and HCs)                          | 5,73     | (2,321 – 9,132)   | 0.001          |
|                                            | CMV and age                                    | 5,29     | (2,235 – 8,339)   | 0.001          |
| <b>Log(T<sub>EM</sub>1) cells</b>          | Group (relapse and non-relapse r-GPA patients) | -.145    | (-.288 – -.002)   | 0.047          |
|                                            | CMV and age                                    | -.135    | (-.263 – -.007)   | 0.040          |
| <b>T<sub>EM</sub>17 cells</b>              | Group (relapse and non-relapse r-GPA patients) | 4.80     | (-.227 – 9.823)   | 0.061          |
|                                            | CMV and age                                    | 4.55     | (.145 – 8.96)     | 0.043          |

5

6

7
